# Supplementary material for: Mycorrhizal Fungal Effects on Plant Growth, Osmolytes, and CsHsp70s and CsPIPs Expression in Leaves of Cucumber under a Short-Term Heat Stress
Source: MDPI journal article supplement (doi:10.3390/plants12162917), 2023-08-11
Supplement: s1 [file s1]

**Supplementary material Table S1** Specific primer sequences of selected genes in this study for qRT-PCR.

| Gene names        | Accession number | Primer sequences (5'→3')                           |
|-------------------|------------------|----------------------------------------------------|
| <i>CsPIP1;1</i>   | Csa5M199270.1    | F: GGGAACACGTGTAAGACCGT<br>R: AACTGCAAATCCGATGGGT  |
| <i>CsPIP1;2</i>   | Csa5M198770.1    | F: GAGTCAACCGATCTCCGTCC<br>R: CCGGATTAATGTGCCCACCT |
| <i>CsPIP1;5</i>   | Csa6M445090.1    | F: TGGGTCTTCGGGGGTATGAT<br>R: CAAGGCTCGGACCAACGATA |
| <i>CsPIP1;6</i>   | Csa3M739030.1    | F: CGCTGGGATTTCTGGTGAGT<br>R: AACACGGCAAACCCAATTGG |
| <i>CsPIP2;1</i>   | Csa6M445130.1    | F: GCGGCGAGAAATTCACATCC<br>R: CAGCTCTCACCAACGACACT |
| <i>CsPIP2;2</i>   | Csa6M445120.1    | F: CAGCGGTGACTTTTGGGTTG<br>R: CTGGTCATCCCATGGCTTGT |
| <i>CsPIP2;3</i>   | Csa6M445140.1    | F: ATCGCCACTCTCCTCTTCCT<br>R: AACACGGCAAACCCAATTGG |
| <i>CsPIP2;6</i>   | Csa6M445150.1    | F: TTGCTCCCCTATGGCCAAAG<br>R: GAGGGGTCGAGAAGAGGTCT |
| <i>CsHsp70-1</i>  | CsaV3_2G009170   | F: AAGGAGAGCGAGCAAGAACC<br>R: ATCATCACCCATCGGAGCAC |
| <i>CsHsp70-2</i>  | CsaV3_2G011210   | F: ATGTCCGAGGTGGATGAGGA<br>R: TAATGAAGCGGCAGTGGGTT |
| <i>CsHsp70-3</i>  | CsaV3_3G013380   | F: TGACATGCTCTCTGGTGCTG<br>R: CTGTGACACCCCTCCTCCTA |
| <i>CsHsp70-4</i>  | CsaV3_3G022450   | F: GGAATGACCAAGGCTGAGCT<br>R: GCCAACTAAACTCCCCAGCT |
| <i>CsHsp70-5</i>  | CsaV3_4G014660   | F: ACGATGCACAGAGACAAGCA<br>R: AAGATGCTTTGCGCCACTTG |
| <i>CsHsp70-6</i>  | CsaV3_4G024840   | F: GGAACCCGTCGAGAAGTGTT<br>R: GTGGTCTTGTCTTCGGCAGA |
| <i>CsHsp70-7</i>  | CsaV3_4G032260   | F: GCGTACCAAATTCAGGCA<br>R: TCCACAGTTGCATTGGACGA   |
| <i>CsHsp70-8</i>  | CsaV3_5G001960   | F: GACTGCAGGAACCTCGGAAA<br>R: ACCTTTGGTAGACTGCGGTG |
| <i>CsHsp70-10</i> | CsaV3_5G026520   | F: TCGGTGATGCTGCCAAGAAT<br>R: GGGATCACCTTGAATGGCCA |
| <i>CsHsp70-11</i> | CsaV3_7G024760   | F: ATGGTATCCCTCCTGCACCT<br>R: CTAGAGGCTGTTGCTTGGCT |
| <i>CsHsp70-12</i> | CsaV3_7G033150   | F: GCGTTACCTGGGTGAGTTGA<br>R: TCAAAGGTGCCACAGGGTTT |
| UBI-ep            | AY372537         | F: CACCAAGCCCAAGAAGATC<br>R: TAAACCTAATCACCACCAGC  |
